# Supplementary material for: Non-Invasive Plasma Glycomic and Metabolic Biomarkers of Post-treatment Control of HIV
Source: Research Square preprint supplement (doi:10.21203/rs.3.rs-132507/v1), 2021-01-08
Supplement: Supplementary file [file 50608d33c33942d0fe241e36.pdf]

**Supplementary Table 3.** Metabolic pathways associated with time-to-viral-rebound in the Philadelphia cohort

| <b>Pathways associated with delayed rebound</b> | <b><i>P</i> value</b> |
|-------------------------------------------------|-----------------------|
| Arginine biosynthesis                           | 9.29E-05              |
| Butanoate metabolism                            | 0.000116              |
| Glutamine and glutamate metabolism              | 0.000677              |
| Alanine, aspartate and glutamate metabolism     | 0.000792              |
| Neomycin, kanamycin and gentamicin biosynthesis | 0.014148              |
| Arginine and proline metabolism                 | 0.028007              |
| Primary bile acid biosynthesis                  | 0.039973              |
| Nitrogen metabolism                             | 0.041899              |
| <b>Pathways associated with faster rebound</b>  |                       |
| Pyruvate metabolism                             | 0.006521              |
| Taurine and hypotaurine metabolism              | 0.04562               |
